# Supplementary material for: Enhanced hydrogen storage kinetics and air stability of nanoconfined NaAlH4 in graphene oxide framework
Source: Royal Society of Chemistry journal article supplement (doi:10.1039/d1ra05111c), 2021-01-01
Supplement: d1ra05111c1.pdf [file d1ra05111c1.pdf]

## Supplementary Information

### Enhanced Hydrogen Storage Kinetics and Air Stability of Nanoconfined NaAlH<sub>4</sub> in Graphene Oxide Framework

Hyung Wan Do,<sup>ab</sup> HyeonJi Kim<sup>a</sup> and Eun Seon Cho<sup>\*a</sup>

<sup>a</sup>Department of Chemical and Biomolecular Engineering, Korea Advanced Institute of Science and Technology (KAIST), Daejeon 34141, Republic of Korea

<sup>b</sup>Current address: KIURI Institute, Yonsei University, Seoul 03722, Republic of Korea

\*Corresponding author: [escho@kaist.ac.kr](mailto:escho@kaist.ac.kr)

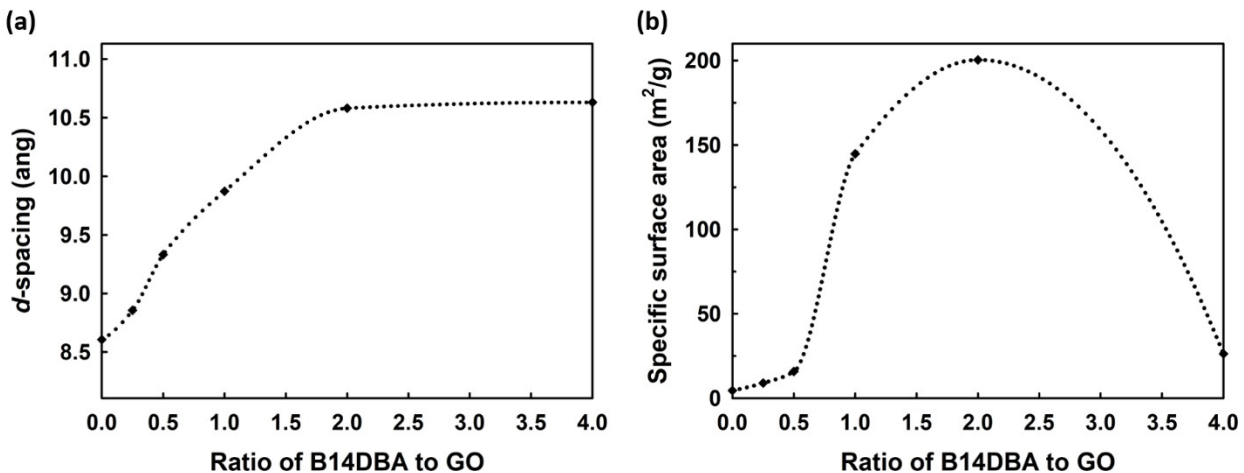

**Fig. S1** (a) The  $d$ -spacing of the prepared GOFs depending on the ratio of B14DBA to GO, calculated from XRD peak analysis. (b) BET specific surface area of GOFs with different ratios of B14DBA to GO, calculated from  $\text{N}_2$  adsorption-desorption isotherm measurements.

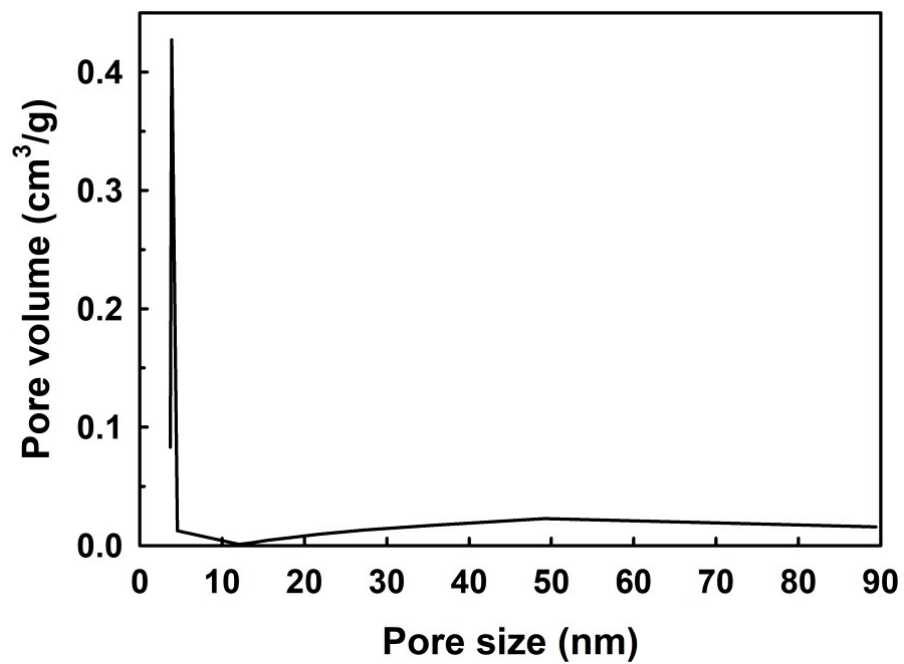

**Fig. S2** BJH desorption  $dV/d\log D$  pore volume vs. pore size for GOF (1:2), showing pore size distribution of the GOF.

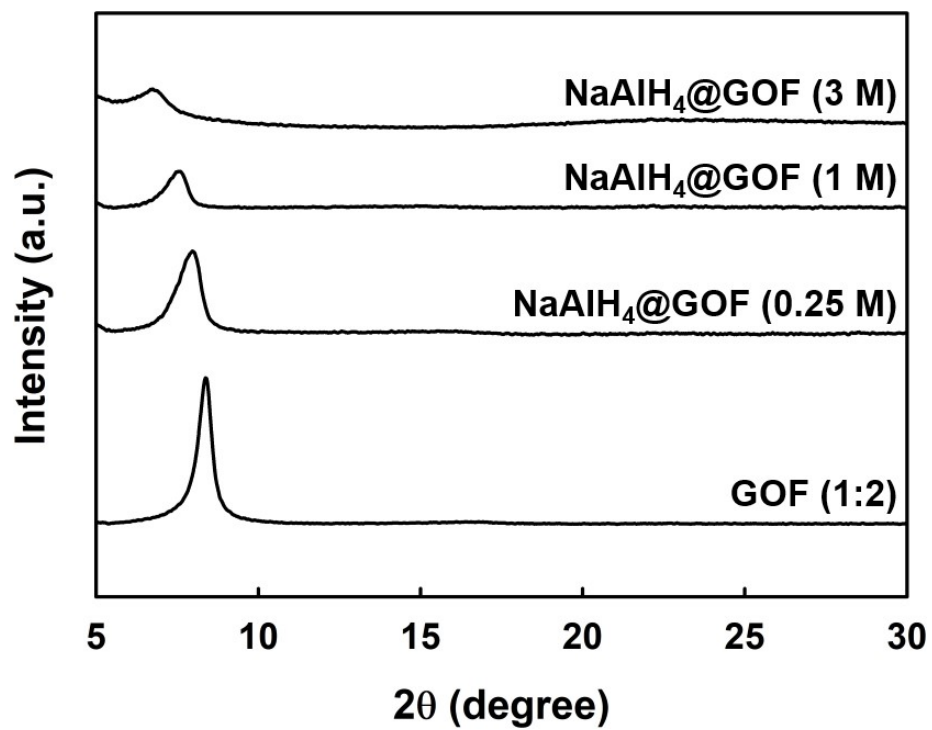

**Fig. S3** XRD patterns of GOF (1:2), NaAlH<sub>4</sub>@GOF (0.25 M), NaAlH<sub>4</sub>@GOF (1 M), and NaAlH<sub>4</sub>@GOF (3 M).

(a) GOF (1:2)

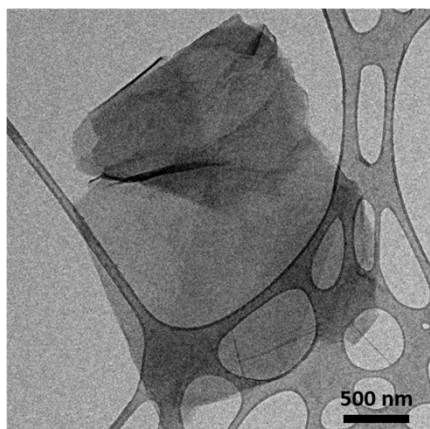

(b) NaAlH<sub>4</sub>@GOF (1 M)

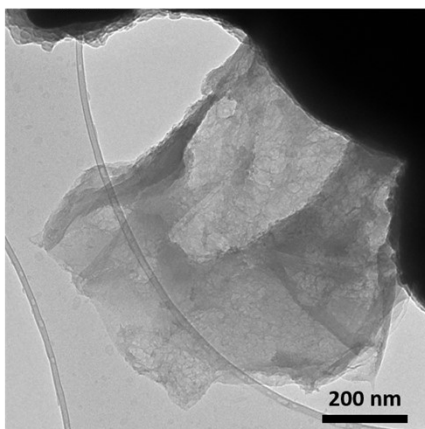

**Fig. S4** TEM images of (a) GOF (1:2) and (b) NaAlH<sub>4</sub>@GOF (1 M). Surface morphology did not show significant changes upon NaAlH<sub>4</sub> infiltration.

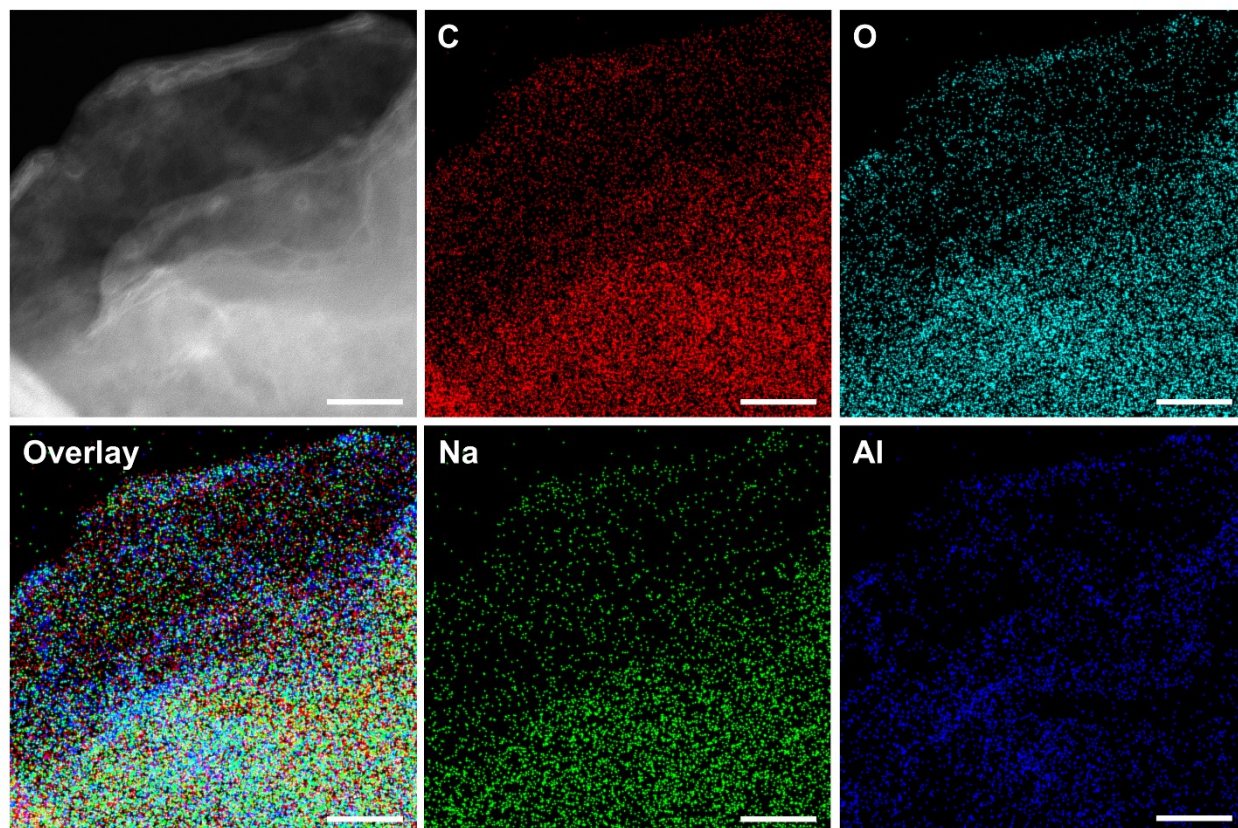

**Fig. S5** BF-STEM-EDS images of  $\text{NaAlH}_4@\text{GOF}$  (1:2) (all scale bars are 50 nm).

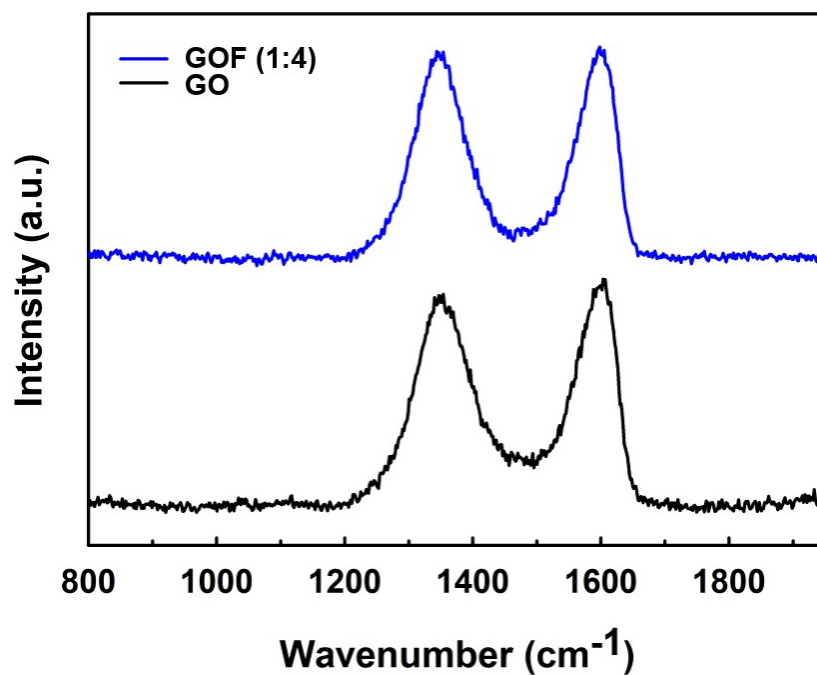

**Fig. S6** Raman spectra showing both D-band and G-band of GO and GOF (1:4). The two spectra are nearly identical in peak position and intensity.

**Table S1.** Summary of activation energies ( $E_a$ ) for the dehydrogenation of bulk, nanoconfined, and catalyst-doped NaAlH<sub>4</sub> from this work and selected previous studies.<sup>1-10</sup>

| Modification                                                | Material                                   | $E_a$ , 1 <sup>st</sup> step (kJ/mol) | $E_a$ , 2 <sup>nd</sup> step (kJ/mol) | Reference |
|-------------------------------------------------------------|--------------------------------------------|---------------------------------------|---------------------------------------|-----------|
| -                                                           | Undoped NaAlH <sub>4</sub>                 | 128                                   | 159                                   | [1]       |
|                                                             | Undoped NaAlH <sub>4</sub>                 | 118.1                                 | 120.7                                 | [2]       |
| Nanoconfined                                                | NaAlH <sub>4</sub> @GOF                    | 47.13                                 | 108.45                                | This work |
|                                                             | NaAlH <sub>4</sub> @porous carbon (200 nm) | 124.3                                 | -                                     | [1]       |
|                                                             | NaAlH <sub>4</sub> @porous carbon (60 nm)  | 102.1                                 | -                                     |           |
|                                                             | NaAlH <sub>4</sub> @porous carbon (30 nm)  | 84.9                                  | -                                     |           |
|                                                             | NaAlH <sub>4</sub> @porous carbon (4 nm)   | 69.7                                  | -                                     |           |
|                                                             | NaAlH <sub>4</sub> @NPC                    | 75.5                                  | -                                     | [3]       |
|                                                             | NaAlH <sub>4</sub> @CMK-3                  | 66.5                                  | -                                     |           |
|                                                             | NaAlH <sub>4</sub> @CNF                    | 58                                    | -                                     | [4]       |
|                                                             | NaAlH <sub>4</sub> @Cu-BTC                 | 53.3                                  | -                                     | [5]       |
|                                                             | Catalyst-doped                             | Ti-doped NaAlH <sub>4</sub>           | 79.5                                  | 97.1      |
| 2D Ti <sub>3</sub> C <sub>2</sub> -doped NaAlH <sub>4</sub> |                                            | 87.3                                  | 88.1                                  | [6]       |
| CeO <sub>2</sub> @C-doped NaAlH <sub>4</sub>                |                                            | 90.3                                  | 81.7                                  | [7]       |
| CeB <sub>6</sub> -doped NaAlH <sub>4</sub>                  |                                            | 69.3                                  | 99.1                                  | [8]       |
| CeO <sub>2</sub> -doped NaAlH <sub>4</sub>                  |                                            | 89.8                                  | 101.6                                 |           |
| CeF <sub>3</sub> -doped NaAlH <sub>4</sub>                  |                                            | 111.6                                 | 108.9                                 |           |
| Nanoconfined and catalyst-doped                             | NaAlH <sub>4</sub> (Ti)@MOF-74(Mg)         | 57.4                                  | -                                     | [9]       |
|                                                             | NaAlH <sub>4</sub> @CeO <sub>2</sub>       | 76.32                                 | -                                     | [10]      |
|                                                             | NaAlH <sub>4</sub> @N-doped NPC            | 44.1                                  | -                                     | [3]       |
|                                                             | NaAlH <sub>4</sub> @N-doped CMK-3          | 45.6                                  | -                                     |           |



## References

1. X. Fan, X. Xiao, J. Shao, L. Zhang, S. Li, H. Ge, Q. Wang and L. Chen, *Nano Energy*, 2013, **2**, 995-1003.
2. G. Sandrock, K. Gross and G. Thomas, *Journal of Alloys and Compounds*, 2002, **339**, 299-308.
3. C. L. Carr, W. Jayawardana, H. Zou, J. L. White, F. El Gabaly, M. S. Conradi, V. Stavila, M. D. Allendorf and E. H. Majzoub, *Chemistry of Materials*, 2018, **30**, 2930-2938.
4. C. P. Baldé, B. P. C. Hereijgers, J. H. Bitter and K. P. de Jong, *Journal of the American Chemical Society*, 2008, **130**, 6761-6765.
5. R. K. Bhakta, S. Maharrey, V. Stavila, A. Highley, T. Alam, E. Majzoub and M. Allendorf, *Physical Chemistry Chemical Physics*, 2012, **14**, 8160-8169.
6. R. Wu, H. Du, Z. Wang, M. Gao, H. Pan and Y. Liu, *Journal of Power Sources*, 2016, **327**, 519-525.
7. X. Zhang, Y. Liu, K. Wang, Y. Li, M. Gao and H. Pan, *ChemSusChem*, 2015, **8**, 4180-4188.
8. X. Fan, X. Xiao, L. Chen, L. Zhang, J. Shao, S. Li, H. Ge and Q. Wang, *Journal of Materials Chemistry A*, 2013, **1**, 9752-9759.
9. V. Stavila, R. K. Bhakta, T. M. Alam, E. H. Majzoub and M. D. Allendorf, *ACS Nano*, 2012, **6**, 9807-9817.
10. Q. Gao, G. Xia and X. Yu, *Nanoscale*, 2017, **9**, 14612-14619.
